# Supplementary material for: Carbon Nanomaterials-Based Screen-Printed Electrodes for Sensing Applications
Source: Biosensors (Basel). 2023 Apr 3;13(4):453. doi: 10.3390/bios13040453 (PMC10136782; doi:10.3390/bios13040453)
Supplement: Supplementary file 1 [file biosensors-13-00453-s001.zip › biosensors-2297262-supplementary.pdf]

# Carbon Nanomaterials-Based Screen-Printed Electrodes for Sensing Applications

Rafael Matias Silva <sup>1</sup>, Alessandra Dias da Silva <sup>1</sup>, Jéssica Rocha Camargo <sup>2</sup>, Bruna Santos de Castro <sup>1</sup>, Laís Muniz Meireles <sup>3</sup>, Patrícia Soares Silva <sup>1</sup>, Bruno Campos Janegitz <sup>2</sup> and Tiago Almeida Silva <sup>1,\*</sup>

Explanations of the abbreviations in Table 1:

**[Ni(dmgh<sub>2</sub>)]**: Nickel (II)-Dimethylglyoxime complexe;

**2D-g-C<sub>3</sub>N<sub>4</sub>/SDS/GNPs/SPE**: 2-dimensional graphitic carbon nitride/sodium dodecyl sulfate/graphene nanoplatelets on the screen-printed electrodes;

**AdTDPV-ERGO-SPEs**: adsorptive transfer stripping differential pulse voltammetry in graphene oxide was electrochemically reduced on SPEs;

**Ag/AgVO<sub>3</sub>/N-rGO/SPCE**: silver vanadate nanorods with silver nanoparticles decorated on the surface of the rods were synthesized by using a simple hydrothermal technique and later anchored onto nitrogen-doped reduced graphene oxide on the screen-printed electrodes;

**AgNPs/GO/SPE**: silver nanoparticles and graphene oxide modified on a screen-printed silver electrode;

**Ag/rGO/β-CD/SPCE**: silver nanoparticles and reduced graphene oxide modified by β-Cyclodextrin on the screen-printed carbon electrode;

**Ag-TiO<sub>2</sub>-rGO/SPE**: silver nanoparticles and titanium oxide and reduced graphene oxide modified screen-printed electrode;

**AIR-GOC/SPE**: atrazine imprinted reduced graphene oxide composite to modify the surface of a screen-printed electrode;

**ASV**: Anodic stripping voltammetry;

**Au/L-cys/Fe<sub>3</sub>O<sub>4</sub>/RGO**: gold nanoparticles and L-cysteine and iron(II, III) oxide on the screen-printed carbon electrode;

**Au/NiO/rGO/SPCE**: gold nanoparticles, nickel(II) oxide nanoparticles, and reduced graphene oxide on the screen-printed carbon electrode;

**AuNP/PEI/RGO/SPE**: gold nanoparticle/polyethyleneimine/reduced graphene oxide modified disposable screen-printed electrode;

**AuNPs/AMBI/rGO/SPCE**: gold nanoparticles, 5-Amino-2-mercaptobenzimidazole, and reduced graphene oxide on screen-printing carbon electrode;

**AuNP-VS<sub>2</sub>-rGO/SPCEs**: gold nanoparticles decorating vanadium sulfide-reduced graphene oxide sheets on screen-printed carbon electrode;

**Bi/LC-rGO/DSPE**: bismuth film, L-cysteine, and reduced graphene oxide on the disposable screen-printed electrode;

**(BiO)<sub>2</sub>CO<sub>3</sub>-rGO-Nafion**: bismuthite, reduced graphene oxide, and Nafion on screen-printed electrodes;

**BTA-rGO/SPCE**: organic heterocyclic benzotriazole was incorporated onto the reduced graphene oxide on a screen-printed carbon electrode;

**C<sub>60</sub>-rGO-NF/SPE**: fullerene, reduced graphene oxide, and Nafion on the screen-printed electrodes;

**CA**: chronoamperometry;

**CdTe-GO/SPE**: cadmium telluride quantum dots and graphene oxide composite materials on screen-printed electrodes;

**ChOx/Pt/rGO/P<sub>3</sub>ABA/SPCE**: cholesterol oxidase/platinum/reduced graphene oxide/poly(3-aminobenzoic acid) (Pt/rGO/P<sub>3</sub>ABA) nanocomposite film on a screen-printed carbon electrode;

**Co@MoS<sub>2</sub>/rGO/SPE:** cobalt oxides functionalized molybdenum disulfide/reduced graphene oxide on the screen-printed electrode;

**CoMn<sub>2</sub>O<sub>4</sub>/RGO/SPCE:** mixed oxide spinel of cobalt and manganese embedded reduced graphene oxide nanocomposite over the surface of modified screen-printed carbon electrode;

**CoOOH-rGO/SPCE:** cobalt oxyhydroxide nanoflakes and reduced graphene oxide over the surface of the screen-printed carbon electrode;

**CuII-GO/SPCE:** copper (II) ions-graphene oxide nanocomplex-modified screen-printed carbon electrode;

**CuBi<sub>2</sub>O<sub>4</sub>/rGO@MoS<sub>2</sub>/SPCE:** copper bismuth oxide, molybdenum disulfide nanocomposite and reduced graphene oxide printed on screen-printed carbon electrode;

**CuO/GO/SPCE:** copper oxide and graphene oxide on screen-printed carbon electrode;

**CV:** cyclic voltammetry;

**DPV:** differential pulse voltammetry;

**EIS:** electrochemical impedance spectroscopy;

**ERGO/ $\beta$ -CD/CdS/SPCE:** reduced graphene oxide/ $\beta$ -cyclodextrin/cadmium sulfide composite on the screen-printed carbon electrode;

**ERGO-AuNPCCAgPPE:** electrochemically reduced graphene oxide with gold nanoparticle and printing of Ag-NP ink and the prepared printed paper-based electrode;

**ErGO + AuNUs:** nanocomposite of graphene oxide and gold nanourchins modify the surface of a screen-printed carbon electrode;

**ERGO/MWCNTs/SPCEs:** reduced graphene oxide/multiwalled carbon nanotubes/modified screen-printed carbon electrodes;

**ERGO-SPE:** reduced graphene oxide modifies the surface of a screen-printed carbon electrode;

**Er-GO-SPE/AuNPs:** reduced graphene oxide and gold nanoparticles were used to modify the working surface of a screen-printed electrode;

**Fe<sub>3</sub>O<sub>4</sub>/GO-MSPE:** iron oxide magnetic nanoparticles doping on reduced graphene oxide to modify a magnetic screen-printed electrode;

**g-C<sub>3</sub>N<sub>4</sub>/rGO/SPE:** graphite-like carbon nitride/reduced graphene oxide composite was deposited on a screen-printed carbon electrode;

**GO-AgNPs/SPCE:** graphene oxide-silver nanoparticle composite deposited on a screen-printed carbon electrode;

**GO/AuNPs/MPBA:** reduced graphene oxide/gold nanoparticles/4-mercaptophenylboronic acid-composites deposited on screen-printed electrodes; **GO-CMF/SPCE:** cellulose microfiber modified graphene oxide deposited on the surface of a screen-printed carbon electrode;

**GO/Fe<sub>3</sub>O<sub>4</sub>/MB/Ab<sub>2</sub>/Ppy:** graphene oxide/nano-iron oxide/methylene blue/secondary antibody/polypyrrole nanohybrids modified a screen-printed gold electrode;

**GOx/AuNP/PANI/rGO/NH<sub>2</sub>-MWCNTs:** glucose oxidase/gold nanoparticles/polyaniline/reduced graphene oxide/amine terminated multiwall carbon nanotubes modified screen-printed carbon electrode;

**GPC/GPC3apt/RGO-Hemin/AuNPs/SPE:** Glypican-3/Glypican-3 aptamer/reduced graphene oxide-hemin nanocomposites/gold nanoparticles modified on the screen-printed electrode surface;

**Graphene/rGOSPE/Pyr-NHS:** graphene/1-Pyrenebutyric acid N-hydroxysuccinimide ester/reduced graphene oxide dual-layer screen-printed electrode;

**LSV:** linear sweep voltammetry;

**M-GRNs/SPCE:** pure graphene nanosheets on screen-printed carbon electrode;

**MnFe<sub>2</sub>O<sub>4</sub>/RGO/SPCE:** manganese ferrite/reduced graphene oxide composite modified on the surface of home-made screen-printed electrodes;

**Mn<sub>2</sub>O<sub>3</sub>-rGO/SPCE:** manganese oxide nanoparticle-decorated reduced graphene oxide modified screen-printed carbon electrodes;

**NH<sub>2</sub>-rGO/TEMPO-nanocellulose/SPE:** amine-functionalized reduced graphene oxide/2,2,6,6-tetramethylpiperidin-1-yl)oxyl nanocrystalline cellulose modified screen-printed electrode;

**NiCo<sub>2</sub>O<sub>4</sub>/RGO/SPE:** mixed nickel-cobalt oxide and reduced graphene oxide on the screen-printed electrode;

**PANINS@rGO/SPCE:** interlayered Polyaniline nanosheets @reduced graphene oxide composite coated on screen-printed carbon electrode;

**PDBS-rGO/SPCE:** block copolymer, poly(DMAEMA-*b*-styrene) and reduced graphene oxide modifying a screen-printed carbon electrode; PEC: photoelectrochemical sensor;

**P-rGO/SPCE:** piperazine functionalized reduced graphene oxide on screen-printed carbon electrode;

**Pt/CODs@rGO/SPCE:** three-dimensional porous reduced graphene oxide decorated with carbon quantum dots and platinum nano-particles modifying a screen-printed carbon electrode;

**PtNFs/rGO:** platinum nanoflowers and reduced graphene oxide nanocomposite on the screen-printed carbon electrode surface; rGO-500/SPCE and of rGO-600/SPCE: reduced graphene oxide by using thermal annealing at 500 °C modifying a screen-printed carbon electrode and reduced graphene oxide by using thermal annealing at 600 °C modifying a screen-printed carbon electrode;

**RGO/AgNWs/AgNPs/SPCE:** reduced graphene oxide with the insertion of silver nanowires followed by the anchoring of silver nanoparticles on screen-printed carbon electrode;

**rGO/Au/Apt/BSA/Mxene/cDNA-MB:** reduced graphene oxide/gold nanoparticles/aptamer/bovine serum albumin/Mxene/complementary DNA labeled with methylene blue on a screen-printed carbon electrode;

**rGO-AuNUs/SPCE:** aptasensor with reduced graphene oxide and gold nano-urchins modifying a screen-printed carbon electrode;

**rGO-Au-SPE:** reduced graphene oxide and a thick layer of gold were used to modify the surface of the screen-printed three electrodes;

**RGO/Au/SPE:** reduced graphene oxide/gold composite modified screen-printed carbon electrode;

**rGO-CeO<sub>2</sub>@Cyt c hydrogel/SPE:** reduced graphene oxide–cerium oxide nanocomposite and cytochrome c hydrogel-modified screen-printed electrodes;

**RGO-Cu<sub>2</sub>O/Fe<sub>2</sub>O<sub>3</sub>/SPGE:** reduced graphene oxide modified with copper oxide and iron(III) oxide nanocomposite on the screen-printed graphite electrode;

**rGO/DWCNTs/Oct-Fe<sub>3</sub>O<sub>4</sub>/Cs/SPAuE:** reduced graphene oxide/double-walled carbon nanotubes/octahedral-Fe<sub>3</sub>O<sub>4</sub>/chitosan composite material modified screen-printed gold electrodes;

**rGO-methionine/SPCE:** reduced graphene oxide and methionine film-modified screen-printed carbon electrode;

**rGO/MFO-2/SPCE:** magnesium ferrites anchored on reduced graphene oxide forming hybrid nanocomposite modifying a screen-printed carbon paste electrode;

**rGO/MWCNTs/Thi/AuNP:** reduced graphene oxide, multiwalled carbon nanotubes, thionine, and gold nanoparticles on a screen-printed electrode;

**rGO/NiBTC/SPCEs:** reduced graphene oxide and metal-organic frameworks (MOFs) of NiBTC to modify screen-printed carbon electrodes;

**rGO-PEDOT:PSS/SPCE:** reduced graphene oxide interspersed with poly(3,4-ethylenedioxythiophene):poly(styrenesulfonate) used as a transducer material deposited on a screen-printed carbon electrode;

**rGO-PPy-AuNPs/SPCE:** nanocomposite of reduced graphene oxide, polypyrrole, and gold nanoparticles was immobilized on the screen-printed carbon electrode;

**rGO-PPy-(L-Cys)-AuNPs/SPCE:** nanocomposite of reduced graphene oxide, polypyrrole, and gold nanoparticles deposited on the surface of screen-printed carbon electrode;

**rGO/PPy NTs-GSPE:** nanocomposite of reduced graphene oxide/polypyrrole nanotubes to modify graphite screen-printed electrode;

**rGO/SPCE:** reduced graphene oxide-Nafion nanocomposite by modifying the surface of screen-printed carbon electrode;

**SPCE-Amino-rGO/IL/Amino-MSNs:** screen-printed carbon electrode was modified with a nanocomposite made from amino-reduced graphene oxide synthesized from natural graphite powder, an ionic liquid and amino-mesoporous silica nanoparticles;

**SPCE-PANI-AuNPs:** immune gold@platinum nanoparticles, neutral red, reduced graphene oxide nanocomposite and regenerative leucoemeraldine base polyaniline/gold nanoparticles modified screen-printed carbon electrode;

**SPCE/rGO/PVA/anti-5mC/BSA/DNA-probe-Fe<sub>3</sub>O<sub>4</sub>-CA nanoparticles:** reduced graphene oxide/polyvinylalcohol/antibody against 5-methylcytosine/bovine serum albumin/ssDNA probe conjugated to Fe<sub>3</sub>O<sub>4</sub>-citric acid nanocomposites on the modified screen-printed carbon electrode;

**SPCEs/GO/cDNA-aptamer/3D-rGO-AuNPs:** graphene oxide complementary DNA-linked-aptamer and hybridization of aptamer-linked 3D-reduced graphene oxide/gold nanoparticles on the modified screen-printed carbon electrode;

**SPC-RGO:** reduced graphene oxide on the screen-printed carbon electrode;

**SPE(a)/rGO-AuNPs:** molecularly imprinted poly(phenol) film modified with reduced graphene oxide and gold nanoparticles on the screen-printed electrode;

**SPE/rGO/AuNPs:** reduced graphene oxide/gold nanoparticles modified screen-printed electrode;

**SPE/rGO-MWCNT, Au nanoparticle, L-cysteine:** nanocomposite of reduced graphene oxide and multiwalled carbon nanotubes, gold nanoparticles, L-cysteine were electrodeposited on a screen-printed carbon electrode;

**SPE/rGO-NHS-AuNFs:** graphene oxide sheets crosslinked with N-hydroxysuccinimide and functionalized with gold nanoflowers modified a screen-printed electrode;

**Sr-ZnO@rGO/SPCE:** strontium doped zinc oxide with reduced graphene oxide modified a screen-printed carbon electrode;

**SW-AdCSV:** square-wave adsorptive cathodic stripping voltammetry;

**SW-CSV:** square wave cathodic stripping voltammetry;

**SWV:** square wave voltammetry;

**TITU-rGO/CSPE:** tris-thiourea and reduced graphene oxide sheets by modifying a miniaturized carbon paste screen-printed electrode;

**WO<sub>3</sub>/SPE:** tungsten (VI) oxide rods modified screen-printed electrode;

**ZnFe<sub>2</sub>O<sub>4</sub>/RGO/SPE:** iron zinc oxide and reduced graphene oxide modified screen-printed electrode;

**ZnO-NPs/rGO/SPCE:** zinc oxide nanoparticles and reduced graphene oxide by modified screen-printed carbon electrode.

Explanations of the abbreviations in Table 2.

**AdSWV:** Adsorptive stripping wave voltammetry;

**ASV:** Anodic stripping voltammetry;

**AuNPs/CNT/SPCE:** gold nanoparticles decorated on carbon nanotube-modified screen-printed electrode;

**CuF/GCE:** copper film-modified glassy carbon electrode;

**CuF/CN/SPE:** copper film with carbon nanotubes modified screen-printed electrode;

**DPAAdSV:** differential-pulse adsorptive stripping voltammetry;

**DPASV:** differential pulse anodic stripping voltammetry;

**IL-SWCNT/SPCE:** screen-printed single-walled carbon nanotubes with ionic liquid 1-butyl-3-metylimidazolium tetrafluoroborate;

**mMWCNTs/SPE:** screen-printed electrode with magnetic nanoparticles and **MWCNTs**; **MWCNTs-COOH/SPCE:** screen-printed carbon electrodes modified with carboxy-functionalized multi-walled carbon nanotubes;

**MWCNTs-CS/SPCE:** screen-printed carbon electrode with MWCNTs and chitosan;

**MWCNT/GP/SPCE:** screen-printed carbon paste electrode combined with multi-walled carbon nanotubes and graphene;

**OD600:** optical density measured at a wavelength of 600 nm;

**RGO-MWCNT-AuNP/SPE:** Graphene oxide/multi-walled carbon nanotubes/gold nanoparticle hybrid functionalized disposable screen-printed carbon electrode;

**SPCE:** single-walled carbon nanotubes-modified screen-printed carbon electrode;

**SPCE-CNT/Nafion:** screen-printed carbon electrode with CNTs and Nafion;

**SPCE/MWCNTs/BiF:** screen-printed carbon sensor modified with multiwalled carbon nanotubes and bismuth film;

**SPCE/MWCNTs-COOH:** screen-printed carbon electrode modified with carboxyl functionalized multiwalled carbon nanotubes;

**SPCE/PAKB NPs/CNTs:** screen-printed carbon electrodes modified with polymeric nanoparticle-carbon nanotube composites;

**SPGPHE:** graphene-modified screen-printed electrode;

**SPCNFE:** carbon nanofibers modified screen-printed electrode;

**SWSV:** Square-wave stripping voltammetry;

**SPCNTE:** multi-walled carbon nanotubes modified screen-printed electrode.

Explanations of the abbreviations in Table 3.

**aGO/CB-OMNiDIP-adduct/SPCE:** acryloylated-graphene oxide/carbon black composite polymer was developed on the screen-printed carbon electrode;

**CB(BP4750)-SPE:** carbon black materials (BLACK PEARLS 4750) was developed on the screen-printed carbon electrode;

**CB-GO-SPCE:** carbon black and graphene oxide modified screen-printed carbon electrode;

**CB-MoS<sub>2</sub>-SPE:** carbon black and molybdenum disulfide modified screen-printed carbon electrode;

**CB-SPE:** carbon black nanomaterial modified screen-printed carbon electrode;

**SPCE/CB-ERGO:** carbon black and electrochemically reduced graphene oxide composite on screen-printed carbon electrodes.

Explanations of the abbreviations in Table 4.

**1 to 7:** SPEs with the working electrode printed using homemade graphite ink for sensors 1–5 or homemade graphite-CQDs ink for sensors 6 and 7;

**Bio–AuNP/Pol/Cu<sub>2</sub>O–CD/SPE:** electrochemical aptasensor based on conducting polymers and nanomaterials (modified carbon quantum dots and biosynthesized gold nanoparticles);

**CS/N, GQDs@SPCE:** doped graphene quantum dots-chitosan nanocomposite-modified nanostructured screen-printed carbon electrode;

**G–QD@Nafion/AuNP–SPCE:** gold nanoparticle-modified screen-printed carbon electrode modified with graphene quantum dots in a Nafion matrix;

**GQDs–NiO–AuNFs/f–MWCNTs (SPCE):** label-free electrochemical aptasensor based on GQDs–NiO–AuNFs/f–MWCNTs modified screen-printed carbon electrode (SPCE);

**GQDs/IL–SPCE:** graphene quantum dots (GQDs) and ionic liquid (IL) modified screen-printed carbon electrode;

**GQDs/SPCE:** immunosensor for AXL using SPCEs modified with amino-group functionalized GQDs;

**GQD/SPEs:** SPE modified by graphene quantum dot; m–GQDs–MIP: IFO-selective m–GQDs–MIP-based nanocomposite synthesized directly on the surface of SPCE;

**(mag@MIP)–GQDs–FG–NF/SPE:** SPE modified with functionalized graphene, graphene quantum dots, and molecularly printed polymer-coated magnetic nanoparticles;

**MagNP/C–dots/SPE:** SPE modified with superparamagnetic MagNP (Fe<sub>3</sub>O<sub>4</sub>) nanoparticles and carbon quantum dots;

**MIP/AuNPs/GQD–SH/SPCE:** molecular printed sensor constructed by modifying the SPCE with graphene thiol quantum dots (GQD–SH) and gold nanoparticles (AuNPs);

**PANI/GQD/SPCE:** polyaniline-graphene quantum dot-modified SPCE; Go/Fe<sub>3</sub>O<sub>4</sub>/SiO<sub>2</sub> nanocomposite: SPE modified with Go/Fe<sub>3</sub>O<sub>4</sub>/SiO<sub>2</sub> nanocomposite;

**PEDOT:PSS/Ti<sub>3</sub>C<sub>2</sub>/GQD:** SPE modified with nanocomposite of poly(3,4-ethylenedioxythiophene):polystyrene sulfonate, titanium carbide and graphene quantum dot;

**Pt/CQDs@rGO/SPCE:** screen-printed carbon electrode (SPCE) modified by depositing three-dimensional porous reduced graphene oxide decorated with carbon quantum dots and platinum nanoparticles.
